# Supplementary material for: Seroprevalence of Q fever among human and animal in Iran; A systematic review and meta-analysis
Source: PubMed Central journal article supplement (PMC5398711; doi:10.1371/journal.pntd.0005521), 2017-04-10
Supplement: pntd.0005521.s001.pdf [file pntd.0005521.s001.pdf]

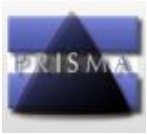

## PRISMA 2009 Flow Diagram

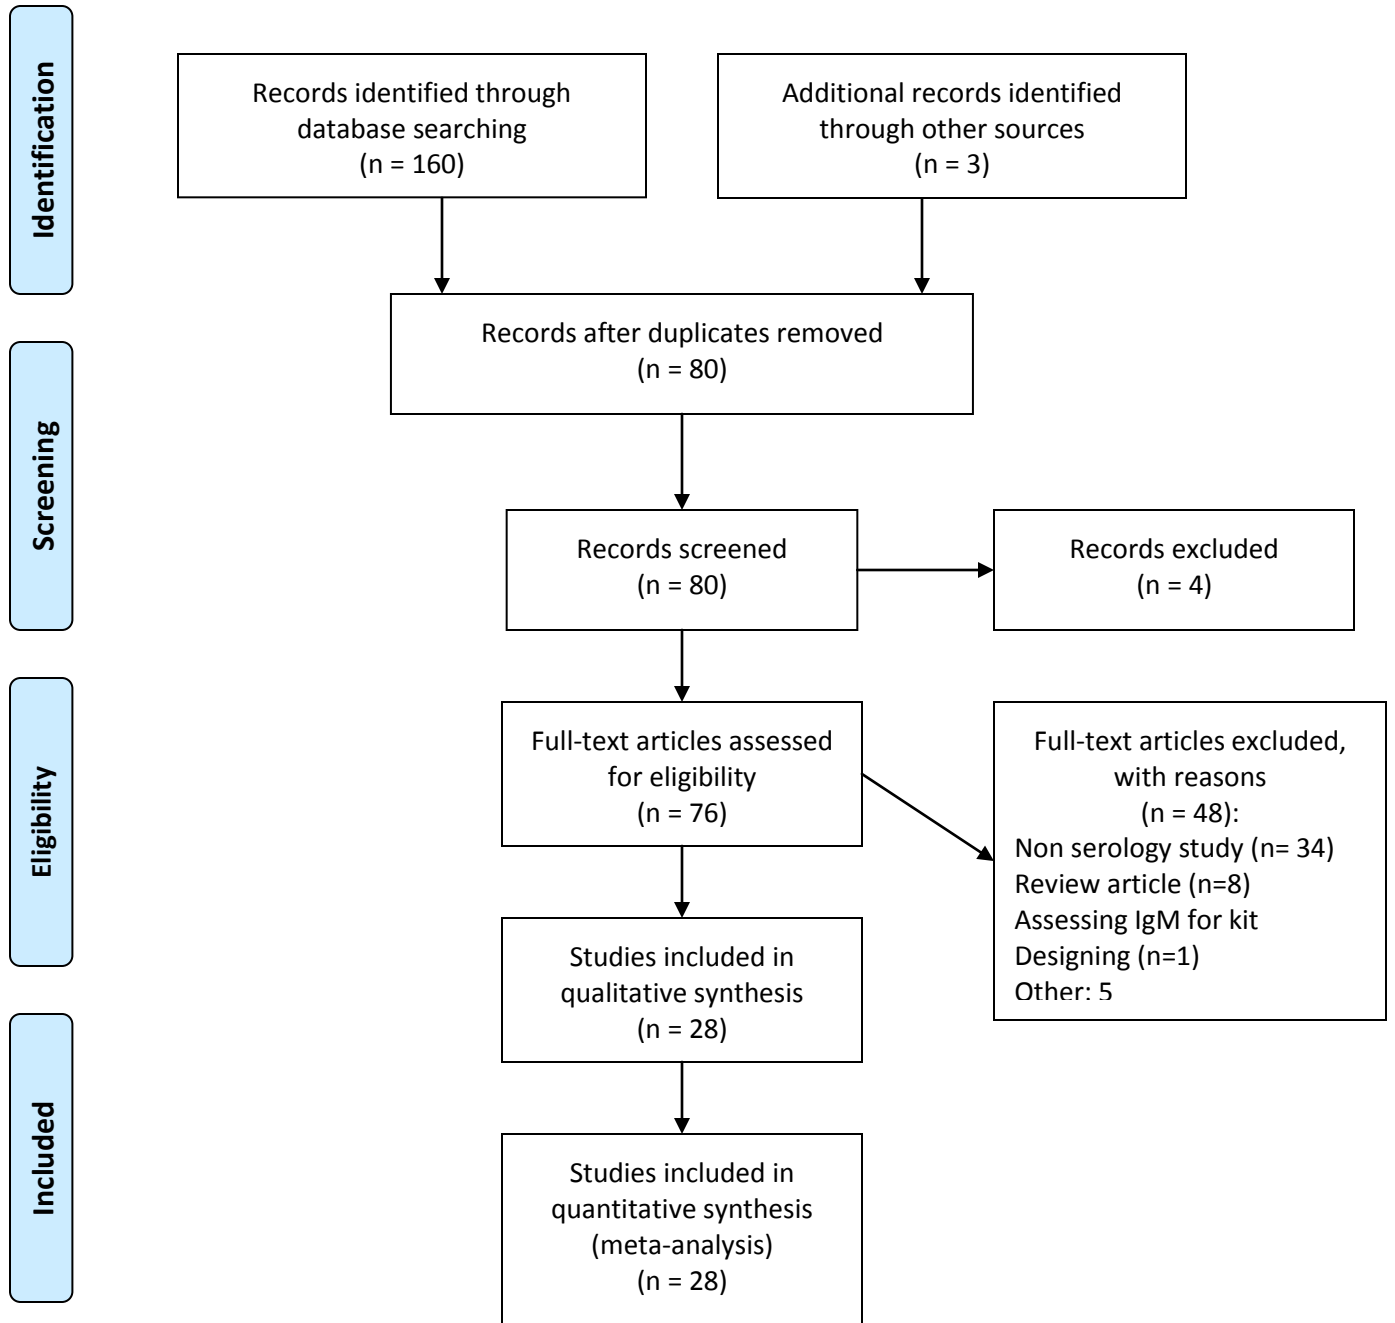

From: Moher D, Liberati A, Tetzlaff J, Altman DG, The PRISMA Group (2009). Preferred Reporting Items for Systematic Reviews and Meta-Analyses: The PRISMA Statement. PLoS Med 6(6): e1000097. doi:10.1371/journal.pmed1000097

For more information, visit [www.prisma-statement.org](http://www.prisma-statement.org).
